# Hypochlorous Acid-Induced Heme Degradation from Lactoperoxidase as a Novel Mechanism of Free Iron Release and Tissue Injury in Inflammatory Diseases

Carlos Eduardo A. Souza<sup>1,9</sup>, Dhiman Maitra<sup>1,9</sup>, Ghassan M. Saed<sup>1</sup>, Michael P. Diamond<sup>1</sup>, Arlindo A. Moura<sup>2</sup>, Subramaniam Pennathur<sup>3</sup>, Husam M. Abu-Soud<sup>1,4\*</sup>

**1** Department of Obstetrics and Gynecology, The C.S. Mott Center for Human Growth and Development, Wayne State University School of Medicine, Detroit, Michigan, United States of America, **2** Federal University of Ceará, Fortaleza, Ceará, Brazil, **3** Division of Nephrology, Department of Internal Medicine, University of Michigan Medical School, Ann Arbor, Michigan, United States of America, **4** Department of Biochemistry and Molecular Biology, Wayne State University School of Medicine, Detroit, Michigan, United States of America

## Abstract

Lactoperoxidase (LPO) is the major consumer of hydrogen peroxide (H<sub>2</sub>O<sub>2</sub>) in the airways through its ability to oxidize thiocyanate (SCN<sup>-</sup>) to produce hypothiocyanous acid, an antimicrobial agent. In nasal inflammatory diseases, such as cystic fibrosis, both LPO and myeloperoxidase (MPO), another mammalian peroxidase secreted by neutrophils, are known to co-localize. The aim of this study was to assess the interaction of LPO and hypochlorous acid (HOCl), the final product of MPO. Our rapid kinetic measurements revealed that HOCl binds rapidly and reversibly to LPO-Fe(III) to form the LPO-Fe(III)-OCl complex, which in turn decayed irreversibly to LPO Compound II through the formation of Compound I. The decay rate constant of Compound II decreased with increasing HOCl concentration with an inflection point at 100 μM HOCl, after which the decay rate increased. This point of inflection is the critical concentration of HOCl beyond which HOCl switches its role, from mediating destabilization of LPO Compound II to LPO heme destruction. Lactoperoxidase heme destruction was associated with protein aggregation, free iron release, and formation of a number of fluorescent heme degradation products. Similar results were obtained when LPO-Fe(II)-O<sub>2</sub>, Compound III, was exposed to HOCl. Heme destruction can be partially or completely prevented in the presence of SCN<sup>-</sup>. On the basis of the present results we concluded that a complex bi-directional relationship exists between LPO activity and HOCl levels at sites of inflammation; LPO serve as a catalytic sink for HOCl, while HOCl serves to modulate LPO catalytic activity, bioavailability, and function.

**Citation:** Souza CEA, Maitra D, Saed GM, Diamond MP, Moura AA, et al. (2011) Hypochlorous Acid-Induced Heme Degradation from Lactoperoxidase as a Novel Mechanism of Free Iron Release and Tissue Injury in Inflammatory Diseases. PLoS ONE 6(11): e27641. doi:10.1371/journal.pone.0027641

**Editor:** Rory Edward Morty, University of Giessen Lung Center, Germany

**Received:** June 23, 2011; **Accepted:** October 21, 2011; **Published:** November 22, 2011

**Copyright:** © 2011 Souza et al. This is an open-access article distributed under the terms of the Creative Commons Attribution License, which permits unrestricted use, distribution, and reproduction in any medium, provided the original author and source are credited.

**Funding:** This work was supported by the National Institutes of Health grant R01 HL066367 and R01HL094230, the Children's Hospital of Michigan, the Doris Duke Foundation Clinical Scientist Development Award and the Molecular Phenotyping Core of the Michigan Nutrition and Obesity Research Center (DK089503). The funders had no role in study design, data collection and analysis, decision to publish, or preparation of the manuscript.

**Competing Interests:** The authors have declared that no competing interests exist.

\* E-mail: habusoud@med.wayne.edu

<sup>9</sup> These authors contributed equally to this work.

## Introduction

Myeloperoxidase (MPO) and lactoperoxidase (LPO) are homologous members of the mammalian peroxidase superfamily which also include eosinophil peroxidase and thyroid peroxidase. These enzymes share an overall 60–70% amino acid sequence homology [1–3]. The heme moiety in the peroxidases is attached to the enzymes through an imidazole nitrogen; its main function is to catalyze the H<sub>2</sub>O<sub>2</sub>-dependent oxidation of halides and pseudo halides to generate the corresponding hypohalous acid, in the catalysis of oxidative reactions [4–6]. LPO is a monomeric protein with a single polypeptide chain of 78.5 kDa, and uses the pseudo halide, thiocyanate (SCN<sup>-</sup>) as a preferred substrate to generate hypothiocyanous acid (HOSCN) [6,7]. Whereas, MPO is a 150–165 kDa, homodimer, each subunit comprising of a pair of light and heavy chains, and uses chloride (Cl<sup>-</sup>) as the preferred substrate to generate hypochlorous acid (HOCl) [2,3,8]. The reaction of peroxidases and the co-substrate H<sub>2</sub>O<sub>2</sub> involves oxygen transfer to Fe(III) to form a ferryl porphyrin π cation radical

(Fe(IV) = O<sup>π+</sup>; Compound I) intermediate as an initial step in the classic peroxidase catalytic cycle [2,3,6,9]. Compound I is a short-lived intermediate and is readily reduced to its 1 electron equivalent, forming a ferryl intermediate (LPO-Fe(IV)=O; Compound II) a longer-lived intermediate whose decay to ferric state is considered to be the rate-limiting step during steady-state catalysis [2,3,10].

Enhancements in peroxidase catalysis due to reduction of compounds I and II have been noted with a series of organic and inorganic substrates [10–13] and physiological reductants generating cytotoxic oxidants and diffusible radical species [14,15]. In addition, the heme moiety of mammalian peroxidases can accommodate a large variety of molecules as a ligand of the iron cation, in which their bindings to the heme moiety inhibit the catalytic activity of the enzymes [10–13]. For example, superoxide and O<sub>2</sub> can serve as ligands for Fe(III) and Fe(II) of peroxidases, respectively, to generate ferrous dioxy complex (Fe(II)-O<sub>2</sub> complex), Compound III [16–18].

Hypochlorous acid (HOCl) generated by MPO plays an important role in killing microorganisms [19]. However, it is also

capable of initiating lipid peroxidation, promoting an array of posttranslational modification of target proteins, injure normal tissues by bleaching the heme moieties of hemoproteins, and oxidatively destroying electron transport chains [20–22]. The rate of HOCl production by neutrophils has been shown to be as high as 450  $\mu\text{M}/\text{h}$  in an *in vitro* study, which may be less in an *in vivo* model, due to scavenging actions of antioxidants [23,24]. Recent studies have shown that catalytically active MPO and its oxidative species are present in human atherosclerotic lesions [25–27]. This implicates the enzyme involvement in low-density lipoprotein oxidation *in vivo* [28]. It has also been shown that iron accumulates in atherosclerotic lesions in a catalytically active form [29,30]. The source of this iron is still unclear, but it is thought to result from hemoglobin released from damaged red cells at sites of vascular turbulence or in hemorrhagic atheromatous plaques [31]. Recently we have shown that under oxidative stress, MPO may serve as a source of free iron through a mechanism that involves heme depletion [32].

LPO and MPO, and their final products commonly participate in tissue injury in a large number of inflammatory conditions, and are used as markers for lung and atherosclerotic cardiovascular diseases [1,2,33,34]. To further assess the potential physiological relevance of HOCl interactions with LPO under conditions that more closely mirror high-risk subjects, such as lung and heart diseases, we investigated the effect of varying HOCl concentrations on LPO-Fe(III) and LPO-Fe(II)-O<sub>2</sub> catalysis in the absence and presence of plasma levels of SCN<sup>-</sup>. A variety of analytical techniques including optical absorbance spectrophotometry, rapid kinetics measurements, high performance liquid chromatography (HPLC), free iron, and SDS-PAGE were utilized in this study. Our results revealed that low levels of HOCl binding to LPO-Fe(III) resulted in a rapid formation and decay of LPO Compounds I and II, suggesting that LPO may serve as a catalytic sink for the removal of HOCl. Increase in the levels of HOCl cause rapid accumulation of LPO Compound II followed by heme destruction and subsequent iron release and protein aggregation. Heme

destruction and protein aggregation can be partially or completely prevented in the presence of increasing levels of SCN<sup>-</sup>.

## Results

### Spectroscopic and rapid-kinetics characterization of the interaction between HOCl and LPO-Fe(III)

Spectroscopic studies demonstrated that incubation of LPO-Fe(III) and LPO Compound II with increasing concentration of HOCl for 30 minutes caused LPO heme destruction, as judged by a decrease and shift in the Soret peak at 412 and 432 nm, respectively (Fig. 1 A and B). Fig. 1 insets show the percentage recovery of LPO as a function of HOCl. We next utilized the diode array stopped-flow instrument to investigate how HOCl influences the LPO catalytic activity and function as may occur under inflammatory condition. Rapid mixing of a buffered solution supplemented with 6  $\mu\text{M}$  LPO-Fe(III) with an equal volume of a similar solution supplemented with 25  $\mu\text{M}$  HOCl in the absence of co-substrates resulted in the rapid formation of a transient complex that displayed a Soret absorbance at 410 nm (Fig. 2A). This spectrum differs from that of ferric LPO, whose Soret maxima is centered at 412 nm. The spectrum of the intermediate initially formed following addition of HOCl to LPO-Fe(III) is consistent with formation of LPO Compound I [35]. This LPO intermediate was formed within 30 ms after mixing at 10°C, but was unstable and rapidly converted partially into a more stable intermediate within 0.5 s, as characterized by a partial time-dependent shift of the Soret band at 412 to 432 nm, together with slight modification in the visible region from 500 to 700 nm. These spectral changes are consistent with the partial formation of LPO Compound II, as shown in Fig. 2B. LPO Compounds I and II were unstable and converted gradually to the LPO-Fe(III), within 1 minute of initiating the reaction (Fig. 2C). Rapid mixing of a solution of LPO-Fe(III) with an equal volume of a 50  $\mu\text{M}$  HOCl show similar results except that formation of Compound I (Fig. 2D) is much faster and completely converted to Compound II

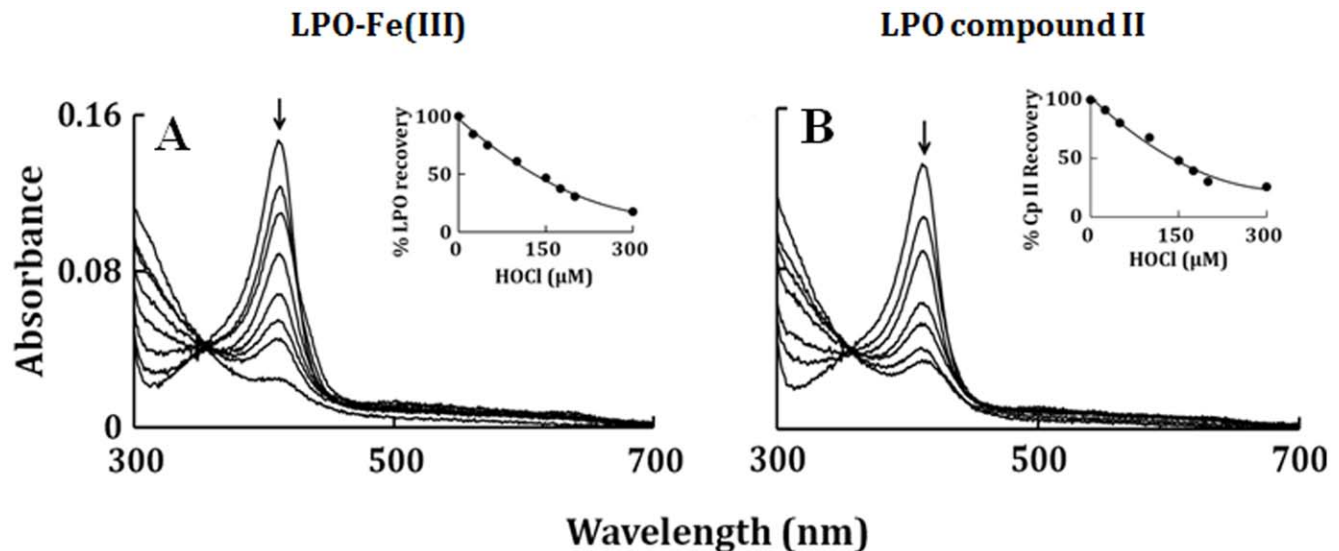

**Figure 1. Optical absorbance spectra for concentration dependent of HOCl-mediated heme depletion of LPO-Fe(III) and LPO Compound II.** Spectral traces were recorded after 2 h of incubation of a fixed amount (1.5  $\mu\text{M}$ ) of LPO-Fe(III) (Panel A) and LPO Compound II (Panel B) with increasing concentration of HOCl (0, 25, 50, 100, 150, 175, 200 and 300  $\mu\text{M}$ ), at 25°C. Arrows in Panel A and B indicate the direction of spectral change. The LPO recovery estimated from the absorbance values at 432 from each spectral scan recorded in the Panels A and B are plotted versus HOCl concentration (Panel A and B insets). These data are representative of three independent experiments.  
doi:10.1371/journal.pone.0027641.g001

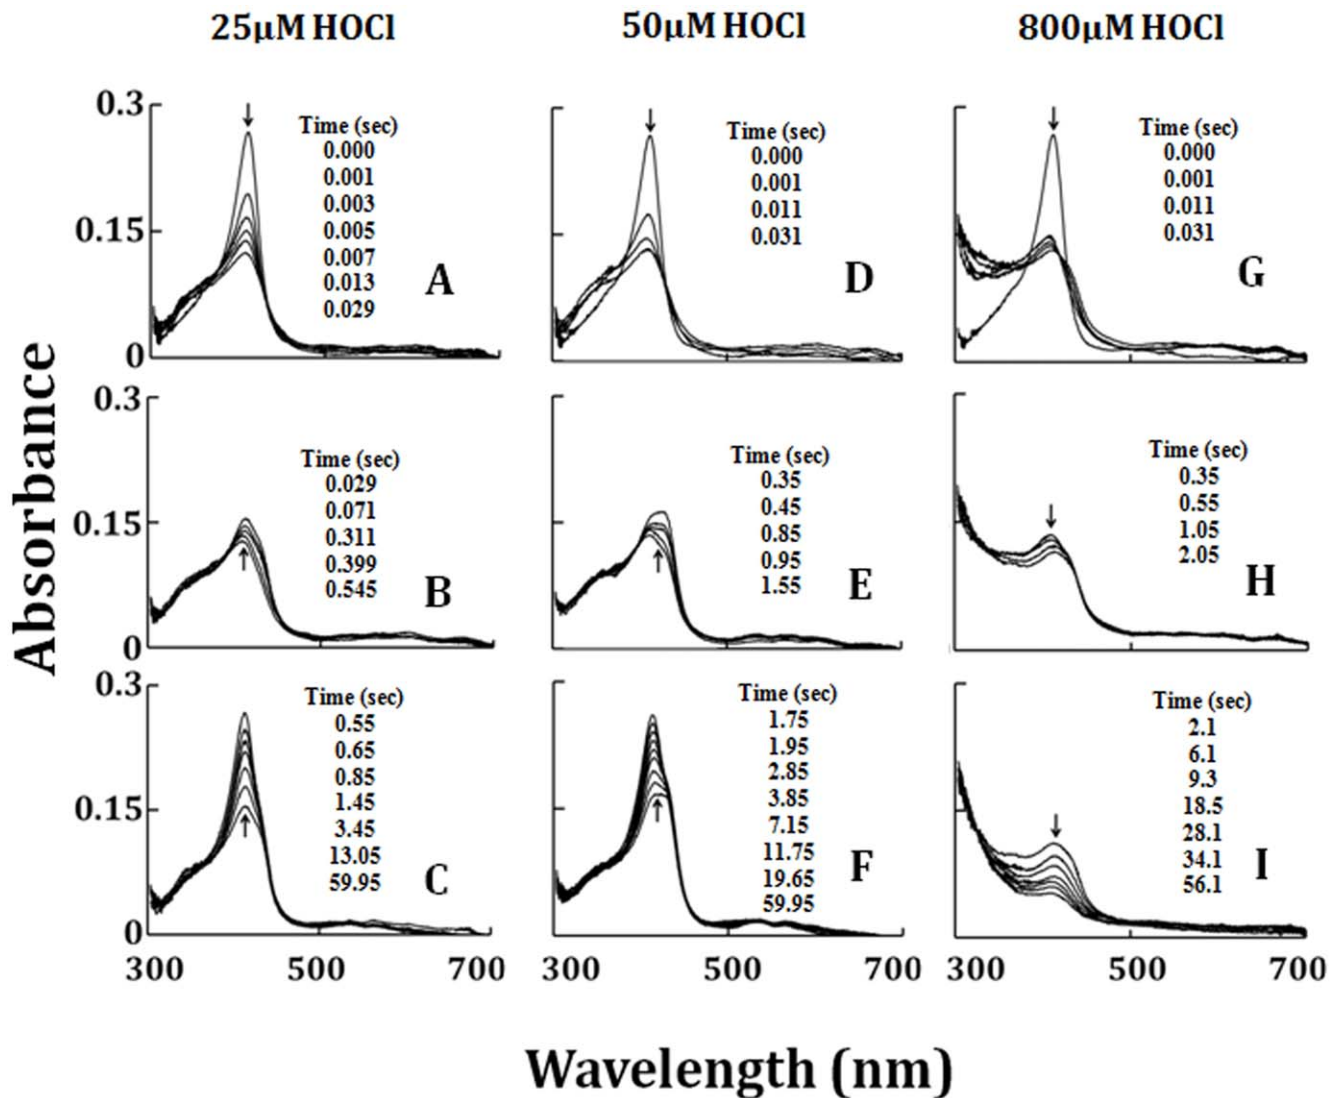

**Figure 2. Formation of LPO Compound I and II and their exhaustion through the reactions of LPO-Fe(II) with increasing concentration of HOCl.** Rapid-scanning diode array spectra were recorded during the reaction of LPO-Fe(III) (3  $\mu$ M) with a buffer solution containing 25  $\mu$ M (Panels A, B, and C), 50  $\mu$ M (Panels D, E, and F), and 800  $\mu$ M (Panels G, H, and I) HOCl, at 10°C. Selected spectra were omitted from each panel for clarity. Arrows in the panels indicate the direction of spectral change over time. The time of each collected spectrum after initiation of the reaction is indicated in seconds. The data are representative of three independent experiments.  
doi:10.1371/journal.pone.0027641.g002

(Fig. 2E), which then decays immediately to LPO-Fe(III) (Fig. 2F). Rapid mixing of a solution of LPO-Fe(III) with higher HOCl concentrations (e.g. 800  $\mu$ M) shows faster formation of Compound I (Fig. 2G), which is converted completely to Compound II in the next 2 s (Fig. 2H). Formation of Compound II by HOCl was accompanied by a marked decrease and flattening in the Soret absorbance region within a minute of initiating the reaction (Fig. 2I), suggesting heme degradation. These spectral changes may also suggest that, under these conditions, the majority of LPO was converted to Fe(IV)=O complex before heme destruction.

To determine the role of the LPO-Fe(II)-O<sub>2</sub> complex in catalytic activity, as well as to further our understanding of the potential role of LPO in catalase-like function, the direct reaction between LPO-Fe(II)-O<sub>2</sub> with HOCl was carried out using rapid kinetic measurements. As shown in Figs. 3A, addition of a slight molar excess of H<sub>2</sub>O<sub>2</sub> to LPO-Fe(III) caused immediate LPO Compound III formation, as judged by a shift in the Soret

absorption peak from 412 to 424 nm, and the appearance of additional absorbance peaks in the visible range at 561 and 595 nm (17,38). This intermediate is relatively stable. Rapid mixing of a buffer solution supplemented with 6  $\mu$ M LPO-Fe(II)-O<sub>2</sub> against a buffer solution supplemented with 300  $\mu$ M of HOCl in the absence of co-substrates (Figs. 3A,B) led to the accumulation of Compound II within the first 28 s of initiating the reaction via the transient initial formation of Compound I. Compound II that accumulated during the reaction then decay back to LPO-Fe(III) within the next 600 s (Fig. 2B). Similar behavior was observed when LPO-Fe(II)-O<sub>2</sub> solution was mixed with 800  $\mu$ M HOCl, except that compound II exhaustion occurred through a heme destruction pathway (Fig. 3D,E). At all HOCl concentrations tested, spectral transitions between each intermediate formed revealed distinct and well-defined isosbestic points (Figs. 2 and 3). Thus sequential formation and decay of LPO intermediates within the peroxidase cycle occur at sufficiently different rates to enable

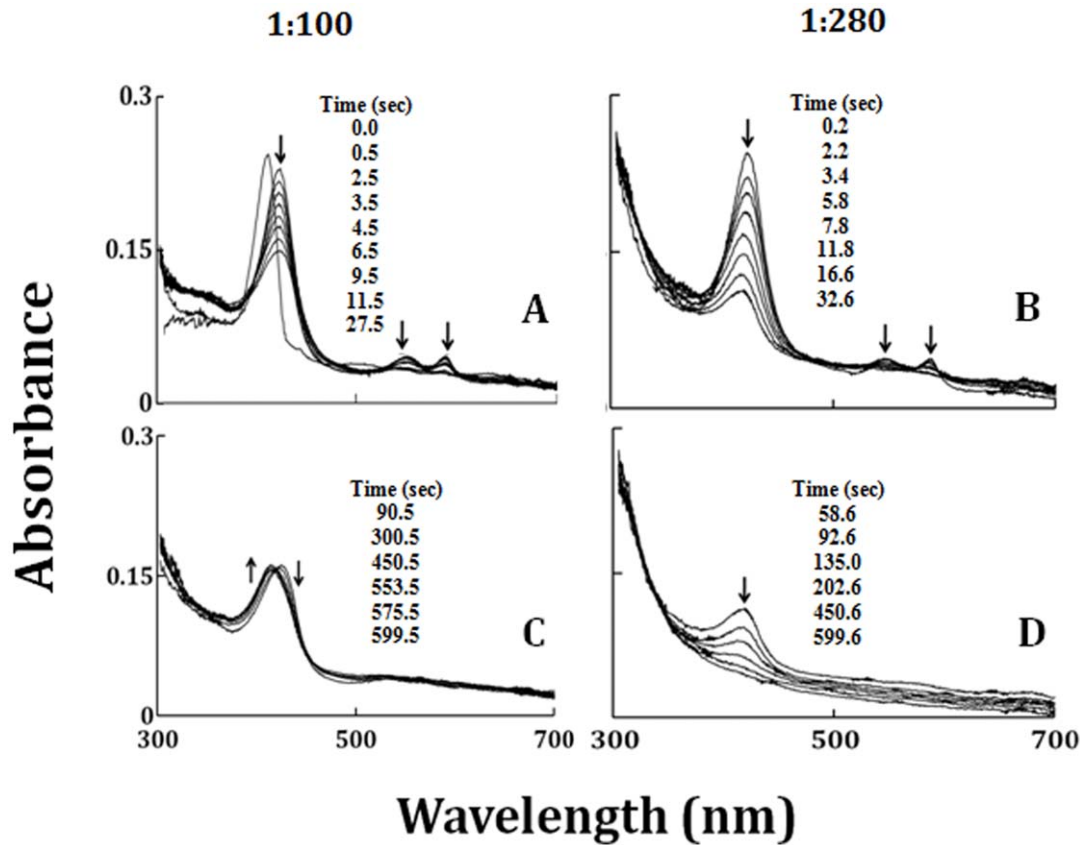

**Figure 3. Diode array spectral changes for the reaction of LPO compound III with increasing concentration of HOCl.** Rapid-scanning diode array spectra were recorded during the reaction of LPO Compound III ( $3 \mu\text{M}$ ) with a buffer solution containing  $300 \mu\text{M}$  (Panels A and B) and  $840 \mu\text{M}$  (Panels C, D, E, F, G, H, and I) HOCl, at  $10^\circ\text{C}$ . Arrows in the panels indicate the direction of spectral changes over time. The time of each collected spectrum after initiation of the reaction is indicated in seconds. The dashed line spectrum is the spectra of the LPO-Fe(III). The first spectrum corresponds with the initial formation of Compound III, which was generated by mixing LPO-Fe(III) with  $200 \mu\text{M}$   $\text{H}_2\text{O}_2$ . The experiments shown are representative of three.

doi:10.1371/journal.pone.0027641.g003

each process to be studied by conventional (i.e. single mixing) stopped-flow methods.

We next utilized stopped-flow spectroscopy to investigate how HOCl interacts with catalytic intermediates of LPO. The influence of HOCl on the kinetics of LPO Compound II build-up, duration and decay were examined following rapid mixing of enzyme and various concentrations of HOCl. The time courses for the formation and decay of Compounds I and II of LPO in the absence of  $\text{SCN}^-$  were detected by monitoring the absorbance change at  $412 \text{ nm}$  and at  $430 \text{ nm}$  (data not shown). At all HOCl concentration tested, there was a monophasic decrease in absorbance at  $412 \text{ nm}$ , attributed to buildup of LPO-Fe(III)-OCl complex formation, followed by a slower, essentially monophasic decrease attributed to heme destruction. As shown in Fig. 4, Panel A, the plot of the observed rate ( $k_{\text{obs}}$ ) versus HOCl concentration was linear, with positive intercept indicating that the reaction is reversible in nature yielding combination and dissociation rate constants estimated from the slope and intercept of  $12.1 \mu\text{M}^{-1} \text{ s}^{-1}$  and  $18 \text{ s}^{-1}$ , respectively. The subsequent increases in absorbance at  $432 \text{ nm}$ , attributed to Compound II formation, were also best fitted to a single exponential function. The plot of the observed rate constant as a function of HOCl concentration was linear with y-intercept close to zero and yielded a second order rate constant of  $0.014 \mu\text{M}^{-1} \text{ s}^{-1}$  (Fig. 4B).

At lower HOCl concentration, HOCl accelerated the decay of Compound II to LPO-Fe(III) (Fig. 2). The rate constant for decay of Compound II decreased with increasing HOCl concentration with an inflection point at  $100 \mu\text{M}$  HOCl, after which the decay rate increased (Fig. 4C). This point of inflection is the critical concentration of HOCl beyond which HOCl switches its role, from mediating destabilization of LPO Compound II to LPO heme destruction. At HOCl higher than the inflection point, the rate of LPO Compound II destruction increased in a linear manner as a function of HOCl concentration line extrapolation was close to zero (Fig. 4C inset; dashed line), indicating that the heme destruction is an irreversible process. The second order rate of HOCl-mediated heme destruction, estimated from the slope (Fig. 4C inset), yielding a second order rate constant of  $1 \times 10^{-4} \mu\text{M}^{-1} \text{ s}^{-1}$ . Finally, HOCl significantly accelerated the rate of LPO-Fe(II)- $\text{O}_2$  decay in a concentration-dependent fashion. Plots of HOCl concentration vs. observed rates of LPO-Fe(II)- $\text{O}_2$  destruction demonstrated linear kinetics and yielded second order rate constants of  $4 \times 10^{-4} \mu\text{M}^{-1} \text{ s}^{-1}$  (Fig. 4D).

#### SCN<sup>-</sup> modulates HOCl-mediated LPO heme degradation

To test the ability of  $\text{SCN}^-$  in modulating HOCl-mediated LPO heme degradation, in a  $1 \text{ ml}$  (final volume) phosphate buffer solution, we first mixed a fixed amount of LPO ( $1.5 \mu\text{M}$ ) with

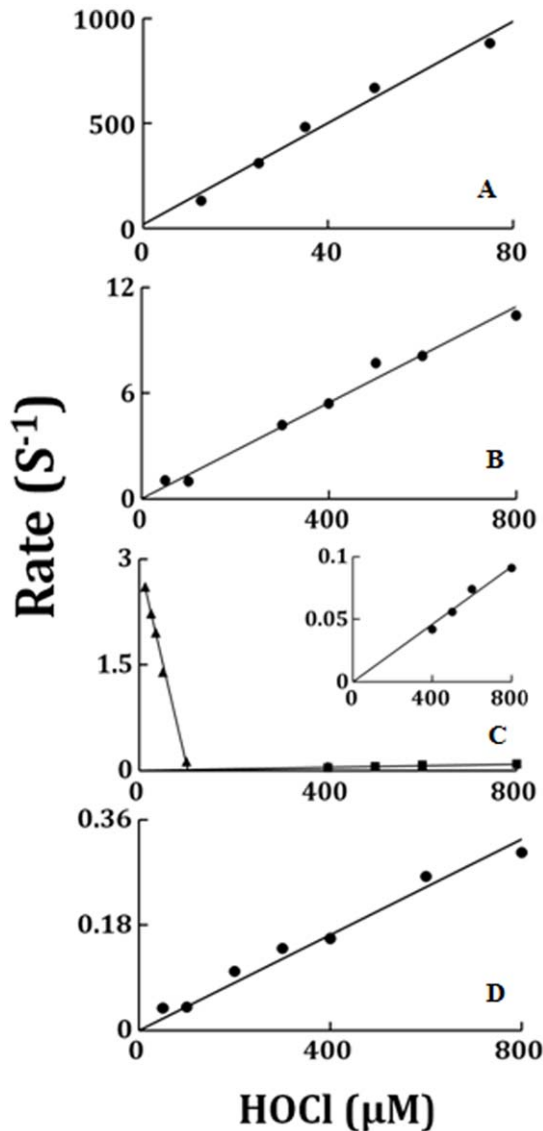

**Figure 4. Plot of observed rate constants of various intermediates that formed upon mixing of LPO-Fe(III) or LPO-Fe(II)-O<sub>2</sub> against increasing concentration of HOCl.** The observed rates of LPO-Fe(III)-OCl formation monitored at 432 nm (Panel A); Compound II accumulation (Panel B); and Compound II decay (Panel C); as for Fig. 2, were plotted as a function of HOCl concentration. In Panel C, the close triangle represent kinetic parameters for Compound II decay to LPO-Fe(III), while the close circles represent kinetic parameters for Compound II destruction. The inset shows the rate of heme destruction, the curve was extrapolated to zero. Panel C is the plots of the observed rates for the LPO Compound III heme destruction versus HOCl concentration, monitored at 424 nm. The data are representative of three separate experiments.  
doi:10.1371/journal.pone.0027641.g004

increasing concentration of SCN<sup>-</sup> (0 to 300 μM) and then the reaction mixtures received fixed concentration of HOCl (300 μM). After 2 hours incubation, the full absorbance spectrum (from 300–700 nm) for each solution mixture was collected, and the percentage recovery in the LPO Soret absorbance peak was plotted as a function of SCN<sup>-</sup> concentration. The percentage recovery increased linearly and maximized (~85%) at 75 μM SCN<sup>-</sup>, a ratio of 4:1 HOCl:SCN<sup>-</sup> (Fig. 5).

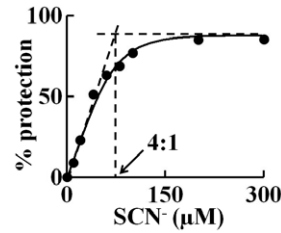

**Figure 5. SCN<sup>-</sup> prevents HOCl mediated LPO heme degradation.** Fixed amount of LPO (1.5 μM) was incubated with increasing concentrations of SCN<sup>-</sup> (0–300 μM) and the reaction mixtures then treated with fixed amount of HOCl (300 μM). After incubating the reaction for 2 hours, absorbance spectra were collected. The percentage protection in LPO heme content was calculated from the absorbance at 412 nm and plotted against SCN<sup>-</sup> concentration. The inflection point (which occurs at 4:1 HOCl:SCN<sup>-</sup> ratio) is marked by the dashed line with arrow. The data are averages of three independent experiments.  
doi:10.1371/journal.pone.0027641.g005

#### HOCl-mediated heme destruction, protein aggregation and free iron release in LPO

As HOCl is thought to oxidize the heme moiety of LPO, we examined whether these spectral transformations that are apparent from our UV-visible spectral analysis may represent the oxidation, free iron release, and subsequently protein aggregation. To investigate how the flattening in the Soret absorbance peak at 412 nm, in HOCl treated samples, is related to modification in the protein moiety of LPO after HOCl treatment, using reducing SDS-PAGE (Fig. 6), we analyzed the protein aggregation in LPO (1.5 μM final) after treatment with 25 to 300 μM of HOCl, by SDS-PAGE. The LPO monomer band intensity decreases slightly until quite near the 1:100 LPO:HOCl ratio, followed by steep plunge till 1:200 LPO:HOCl ratio after which it saturates. In contrast, the monomer:oligomer band intensity showed a steady increase till 1:200 LPO:HOCl ratio after which it saturates. With the largest amounts of HOCl, the distinct pattern of aggregation disappeared, producing smears over the entire length of the lanes. This could be attributed either to the formation of aggregates that were too large to enter the separating gel, or to fragmentation. Bonini *et al.*, have obtained similar aggregation patterns when catalase was treated with HOCl (39). Free iron accumulation when assayed by ferrozine (as detailed in *Materials and Methods*) showed a linear increase as a function of HOCl concentration (Fig. 7).

#### HPLC analysis of heme degradation products from LPO

Heme by itself does not have any intrinsic fluorescence, but porphyrin derivatives generated due to oxidative fragmentation of heme do have an intrinsic fluorescence. We used this property to analyze the heme fragmentation pattern after HOCl treatment of LPO. Based on a previously published report we chose to monitor the chromatograms at excitation 321 nm and emission 465 nm [36,37]. Fig. 8 shows the chromatograms when LPO was treated with different molar ratios of HOCl. We incubated a fixed amount of LPO (10 μM) with increasing molar ratios of HOCl (1:25, 1:200 and 1:400). When LPO was reacted with HOCl, there was a progressive accumulation of new heme degradation products (as a function of HOCl concentration) eluting at earlier time. By comparing the chromatograms we concluded that HOCl treatment led to the formation of at least three different fluorescent degradation products with retention times of 2, 3.3, 5 and 8 minutes, respectively. The appearance of new earlier eluting

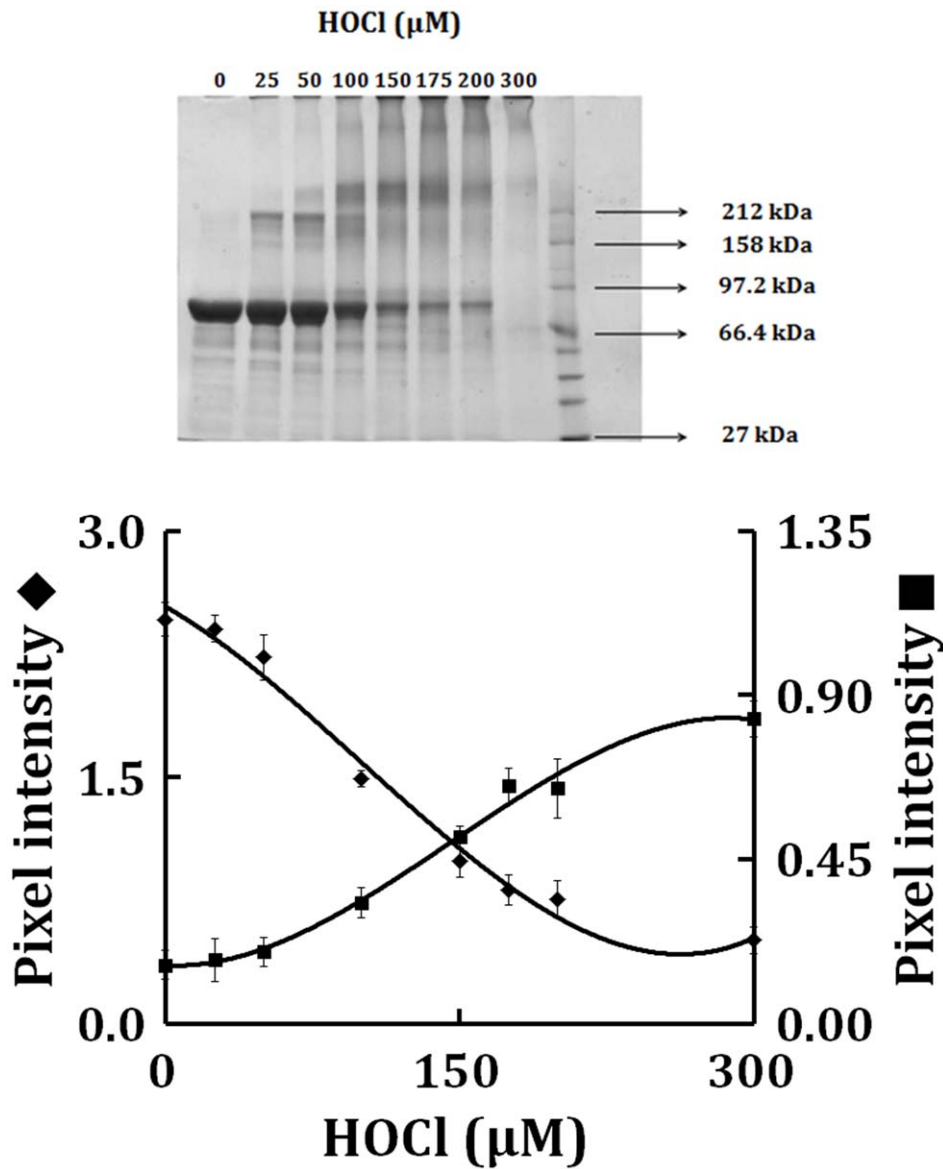

**Figure 6. Protein aggregation of LPO treated with different HOCl concentrations.** Upper panel depicts the reducing SDS-PAGE of LPO treated with HOCl, showing a decrease in the main LPO band, and a concomitant increase of high molecular weight aggregates. Lower panel displays a plot showing the variations of pixel intensity of LPO monomer (closed diamond) and high molecular weight aggregates (closed square) as a function of HOCl concentration. Reaction was carried-out by mixing a buffered solution of LPO (1.5 μM final) with HOCl, and the gel was run after 60 minutes incubation, at 25°C. These data are representative of three independent experiments.  
doi:10.1371/journal.pone.0027641.g006

peaks in the chromatograms could be due to the formation of degradation products with decreasing hydrophobicity generated by fragmentation of the tetrapyrrole ring of the heme.

## Discussion

LPO is present in different biological fluids and epithelial surfaces, including the oral cavity and the airways [38–40], as part of the innate defense system. In the human oral cavity, the LPO defense system usually works in concert with other local defenses, like MPO, lysozyme and lactoferrin, to ensure tissue protection [40,41]. Although LPO and MPO function to keep sterility of the airway system in the setting of constant exposure to inhaled debris and potential pathogens, they may also play a role in tissue defense against oxidative stress through their ability to scavenge excess

$H_2O_2$  and protect the airway epithelium from its toxicity [38,42]. This is especially important in the airways, where catalase is present in the peroxisomal system, but not secreted in the luminal fluid [43], thereby making mammalian peroxidases the main  $H_2O_2$  scavengers. In addition to higher levels of LPO and MPO, patients with asthma, cystic fibrosis, and chronic obstructive pulmonary disease display higher levels of free iron in their lung compared to normal subjects [44–46]. As yet the source of the free iron is still unclear, but one major source of free iron may be the destruction of heme moiety from hemoproteins and the release of the iron residing in active sites of these proteins. Evidence for the involvement of the LPO/HOCl system as this source is the high affinity of LPO-Fe(III) towards HOCl and the ability of HOCl to destroy the catalytic center of the enzyme, which is, in this case, the heme moiety.

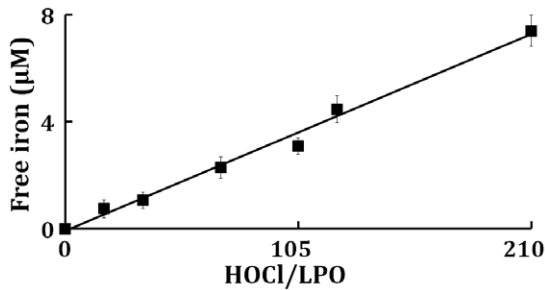

**Figure 7. Release of free iron from LPO following treatment with HOCl.** 10 µM of LPO-Fe(III) were incubated with increasing HOCl concentrations (0, 175, 350, 700, 1050, 1400, and 2100 µM) for 30 minutes, at 25°C. Free iron was assayed colorimetrically using ferrozine (for details see *Materials and Methods* section). Experiments were carried out in sodium phosphate buffer (0.2 M at pH 7.0). These data are representative of three independent experiments. doi:10.1371/journal.pone.0027641.g007

Previous study by Furtmuller *et al.*, has shown that the formation of LPO compound I through the reaction of LPO-Fe(III) with HOCl is extremely fast in contrast to a two electrons reduction of  $H_2O_2$ , and occurs in a concentration dependent fashion [47]. The results of the present study confirmed and extended these findings, and demonstrate that HOCl not only mediates the formation of LPO Compound I, but it also mediates LPO protein aggregation, heme destruction, and subsequent iron release. During continuous monitoring the reaction of  $OCl^-$  with LPO-Fe(III) with diode array stopped-flow methods, rates of LPO Compound I formation were dramatically accelerated as a function of HOCl concentration. HOCl-dependent formation of Compound I was catalytic, since low levels of  $OCl^-$  were required, relative to the concentration of LPO used. Furthermore, HOCl-dependent formation of LPO Compound I occurred in concentrations of HOCl that span both the physiological and pathophysiological range. It is possible that the heterolytic cleavage of the O-Cl bond in an LPO-Fe(III)-OCl intermediate preferentially occur at neutral conditions, to degrade HOCl and form a ferryl porphyrin radical cation LPO-Fe(IV)=O<sup>•</sup> intermediate. This intermediate is highly unstable and immediately decays to form LPO-Fe(IV)=O complex. The degree of Compound II accumulation, stability, and its exhaustion pathway depend mainly on the HOCl concentration used. The transition of the pathway of Compound II exhaustion is reflected by the deflection in the decay rate with a HOCl critical concentration of 100 µM (Fig. 3C). Below this concentration, HOCl is capable of destabilizing LPO Compound II and did not cause LPO heme destruction. Concentrations of HOCl generated by the activated blood neutrophils range between 150–425 µM HOCl per h [23,48]. Thus, the beneficiary role of LPO is not only limited to scavenging of HOCl, but also activating LPO by accelerating the conversion of Compounds II and III to LPO-Fe(III), the active form of the enzyme. These finding may display an important application in biological systems, since scavenging HOCl by LPO may protect the airway epithelium from its toxicity. But above the critical concentration, HOCl irreversibly mediates heme destruction and subsequent free iron liberation as well as protein aggregation. Consistent with this notion, the colorimetric ferrozine-based assay for quantitation of free iron showed a corresponding increase in free iron production as a function of HOCl concentration. The toxic effect of free iron is due to its ability to generate other ROS, such as the  $O_2^{\bullet-}$ ,  $H_2O_2$ , and the hydroxyl radical ( $\cdot OH$ ), that mediate cellular mitochondria poisoning, lipid peroxidation, and oxidative phos-

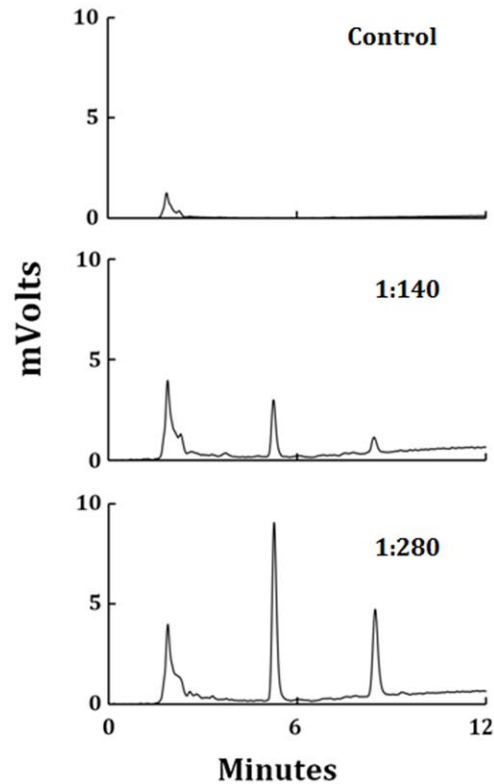

**Figure 8. Treatment of LPO with HOCl leads to the generation of fluorescent heme degradation products.** LPO (1.5 µM) was treated with increasing ratios of HOCl (control, 1:140, and 1:280) and analyzed by HPLC, as detailed in the *Materials and Methods* section. The fluorescent detector was set at excitation 321 nm and emission 465 nm. The molar ratio of the LPO:HOCl used for treatment is mentioned in inset of each panel. This data are representative of three independent experiments. doi:10.1371/journal.pone.0027641.g008

phorylation uncoupling [49–51]. Free iron damages blood vessels and induces vasodilation with increased vascular permeability, leading to hypotension and metabolic acidosis [31,52]. Under many pathological conditions such as atherosclerosis, endometriosis, and cancer, where MPO has been known to play a role, there have been reports of significant free iron accumulation [53,54].

Compound II is the major inactive intermediate that accumulates prior to heme destruction. It is not clear whether the formation of LPO Compound II is essential for HOCl-mediated heme destruction directly or else possibly indirectly after incorporation into another intermediate, more susceptible to heme destruction than Compound II. The high stability of Compound II during the peroxidase cycle makes the LPO tetrapyrrole ring more susceptible to a direct HOCl attack. We propose that HOCl mediated cleavage of the tetrapyrrole moiety occurs through a radical based mechanism, as shown in our previous studies [36,37]. Alternatively, the heme moiety of Compound II, in the presence of HOCl, could be destroyed through the formation of LPO-Fe(III)-OO<sup>-</sup> radical [55]. Under these circumstances, the formation rate of the Compound II is comparable or slower than the decay of this intermediate, therefore the buildup of the LPO-Fe(III)-OO<sup>-</sup> radical cannot be seen, and the conversion of Compound II to LPO-Fe(III)-OO<sup>-</sup> is the rate limiting step and occurs independently of the HOCl concentration. LPO heme destruction is also confirmed by HPLC analysis, which revealed that at least three fluorescent heme degradation

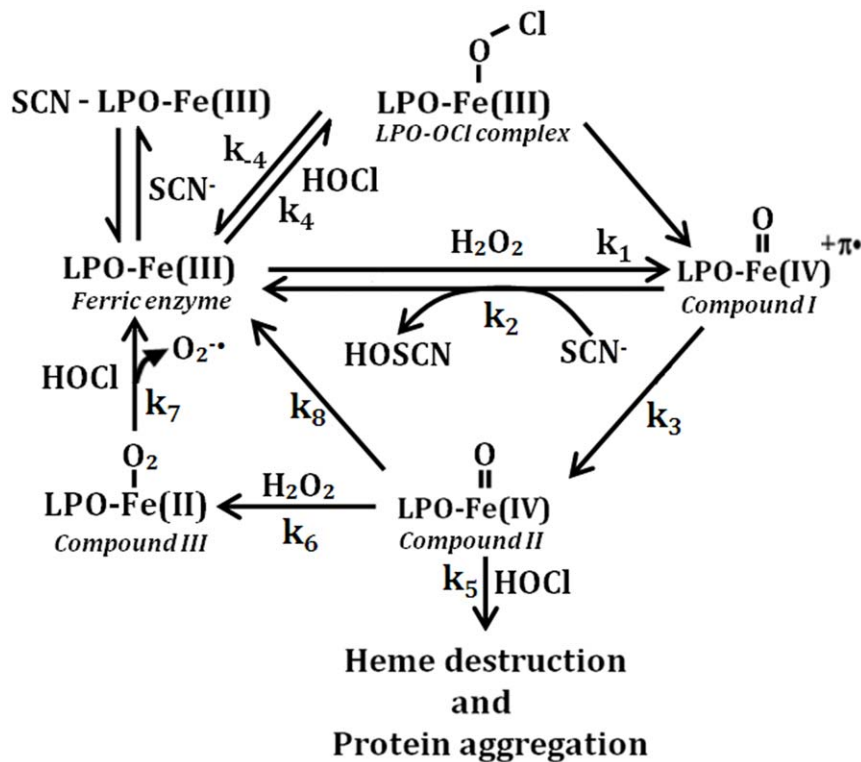

**Figure 9. A general kinetic scheme showing the influence of HOCl on the LPO catalytic cycle.**  
doi:10.1371/journal.pone.0027641.g009

products were observed. Similar fluorescent bands were also observed when oxy-Hb, hematin, MPO, as well as protoporphyrin IX were treated with increasing concentrations of HOCl [36,37]. Collectively, this work demonstrates the ability of HOCl to modulate heme destruction through oxidative cleavage of one or more carbon-methene bridges of the tetrapyrrole moiety. We suggest that this phenomenon may partially elucidate the significant role played by HOCl in pathological conditions.

HOCl also mediates the heme destruction of LPO-Fe(II)-O<sub>2</sub> complex through a mechanism that initially involves heme oxidation, but otherwise the kinetics of heme destruction was almost similar to those obtained for LPO-Fe(III) with HOCl. Under these circumstances the oxidized form of the enzyme can no longer bind oxygen but it can bind the OCl<sup>-</sup> molecule. Based on our kinetic model illustrated in Fig. 9 (see also Table 1, for the rate constants of each step), the three main pathways that lead to the formation of LPO Compound III are: the direct reaction between O<sub>2</sub> and superoxide with LPO-Fe(II) and LPO-Fe(III), respectively, or the addition of a slight molar excess of H<sub>2</sub>O<sub>2</sub> to LPO-Fe(III). The role of LPO Compound III in biological systems is still unclear. The reverse rate constant ( $k_{off}$ ) of LPO-Fe(II)-O<sub>2</sub> binding is significantly higher when compared with that of other hemoproteins [16]. Several factors and conditions may account for the high dissociation rate in LPO-Fe(II)-O<sub>2</sub>, including: the positive *trans* effect contributed by the peroxymal ligand, the heme pocket microenvironment, and the geometry of Fe-O<sub>2</sub> linkage. This notion is consistent with earlier resonance Raman spectroscopy studies, which showed that the  $\nu(\text{Fe}-\text{O}_2)$  frequency for LPO was, to a large extent, lower than those reported for related and relevant hemoprotein model compounds [56]. We believe that the high dissociation rate of LPO-Fe(II)-O<sub>2</sub> complex [16] is a key feature that drives rapid oxidation and decomposition of the enzyme-O<sub>2</sub> complex, and promotes generation of ligand-free LPO-Fe(III).

Previously, we have shown that the formation of an LPO-Fe-O<sub>2</sub> complex intermediate in the catalytic mechanism of the enzyme [16]. As such, low OCl<sup>-</sup> concentration might represent an alternative pathway, whose biological function is to destabilize LPO Compound III, an inactive form of the enzyme, and restore its catalytic activity and rejoin the peroxidase cycle after the removal of unwanted HOCl.

A reducing and denaturing SDS-PAGE showed different degrees of protein aggregation as a function of HOCl concentration. The degree of LPO protein aggregation induced by HOCl was much less than when hemoglobin/apohemoglobin or catalase was treated with HOCl under identical experimental conditions. In addition, globin aggregation in hemoglobin occurred independently of iron presence. Indeed, previous studies by Chapman *et al.*

**Table 1. Rates for the reactions depicted in the kinetic model in Fig. 9.**

| Step            | Rate                                                    | References    |
|-----------------|---------------------------------------------------------|---------------|
| k <sub>1</sub>  | 11 μm <sup>-1</sup> s <sup>-1</sup>                     | [47]          |
| k <sub>2</sub>  | 200 μm <sup>-1</sup> s <sup>-1</sup>                    | [47]          |
| k <sub>3</sub>  | 0.014 μm <sup>-1</sup> s <sup>-1</sup>                  | Present study |
| k <sub>4</sub>  | 12.1 μm <sup>-1</sup> s <sup>-1</sup>                   | Present study |
| k <sub>-4</sub> | 18 s <sup>-1</sup>                                      | Present study |
| k <sub>5</sub>  | 1 × 10 <sup>-4</sup> μm <sup>-1</sup> s <sup>-1</sup>   | Present study |
| k <sub>6</sub>  | 2.2 × 10 <sup>-4</sup> μm <sup>-1</sup> s <sup>-1</sup> | [86]          |
| k <sub>7</sub>  | 4 × 10 <sup>-4</sup> μm <sup>-1</sup> s <sup>-1</sup>   | Present study |
| k <sub>8</sub>  | 0.0005 s <sup>-1</sup>                                  | [12]          |

doi:10.1371/journal.pone.0027641.t001



*al.* [57]. Utilizing extensive biochemical and mass-spectrometric studies have shown that as a result of exposure to HOCl, apohemoglobin undergoes aggregation and produces a regular series of high molecular weight oligomers [57]. This change in the protein structure in hemoglobin was facilitated by the formation of protein carbonyls and possibly chloramines, along with methionine oxidation, which altered the protein folding and, subsequently, the secondary/tertiary structure of the protein. The process of aggregation was due to non-covalent interaction between the exposed hydrophobic areas on neighboring molecules that associate to form dimers and higher-molecular mass aggregates [57]. Recent studies with intact hemoglobin have shown similar patterns of protein aggregation in reducing SDS PAGE, except for a distinct dimer band we observed, even at higher HOCl:Hb ratios [36]. This process could lead to the formation of aggregated proteins at sites of inflammation where MPO activity and subsequently HOCl generation is enhanced, and may contribute to tissue injury. Aggregated proteins are formed during aging [58], in diabetes [59] and in neurodegenerative diseases, including Creutzfeldt-Jacob disease, Huntington's disease, Alzheimer's disease and Parkinson's disease [60,61].

LPO Compound I preferentially catalyzes the 2-electron oxidation of  $\text{SCN}^-$ , generating the corresponding HOSCN. LPO Compound I may also oxidize  $\text{SCN}^-$  through a two sequential one-electron steps, forming Compound II and LPO-Fe(III), respectively [62]. The ability of both LPO Compounds I and II to employ  $\text{SCN}^-$  as a  $1e^-$  substrate prevents LPO heme destruction mediated by HOCl, and influences the nature of the end products of the  $\text{SCN}^-$  oxidation reaction. Our results clearly showed that the protection of HOCl mediated LPO heme degradation require a ratio of at least 4:1 HOCl: $\text{SCN}^-$  (Fig. 5). One electron oxidation of  $\text{SCN}^-$  yields unstable thiocyanate radical, which then dimerizes to generate a labile short-lived intermediate, thiocyanogen ( $\text{SCN}_2$ ) [63,64]. The resulting ( $\text{SCN}_2$ ) is rapidly hydrolyzed to generate either HOSCN/OSCN $^-$  or  $\text{CN}^-$  without the formation of HOSCN as an end product [61,63,65,66]. Alternatively,  $\text{SCN}^-$  can react directly with HOCl to generate HOSCN [67]. Taken together, these studies suggest that LPO may serve as a catalytic sink for HOCl, regulating its bioavailability and function.

HOCl-mediated LPO heme destruction events are likely to occur extracellularly. LPO is secreted from the goblet cells and submucosal glands which is a major constituent of the mucus and is very important constituent for maintaining anti-infective properties of airway epithelium [68]. It is likely that MPO is independently secreted into sites of inflammation from phagocytic cells. In the airway, we believe that there is a balance between HOCl and  $\text{SCN}^-$ . Disturbance of this balance allows LPO to serve as a source of free iron. The normal  $\text{SCN}^-$  concentration in the plasma is ranging from 20 to 120  $\mu\text{M}$ , while in airways secretion it is about 460  $\mu\text{M}$  [69,70]. But under certain pathological conditions such as cystic fibrosis, the level of  $\text{SCN}^-$  is known to be, as low as, 0.5  $\mu\text{M}$  which disrupts the microbicidal function of LPO [71–73]. Direct measurement of HOCl in the airways has not been done and would be difficult since HOCl is very labile and reactive. Using computational modeling the level of HOCl generated from activated neutrophils has been estimated to be 150–425  $\mu\text{M}$  HOCl/hour and at sites of inflammation it has been estimated to reach, as high as, 5 mM [74]. During airway inflammation there is increased neutrophil influx and the neutrophil count in the airway increases from  $34.1 \times 10^3/\text{mL}$  to  $115.7 \times 10^3/\text{mL}$  [73]. Also the MPO protein level increases to 4.68 nM from 0.12 nM [73]. This increased MPO leads to an increase in HOCl production along with its subsequent damage to

the biomolecules. Indeed Van der vliet *et al.*, have shown that in cystic fibrosis, MPO is the chief mediator of oxidative damage within the respiratory tract [75]. They also suggested that the localized MPO concentration could reach around 0.5–10  $\mu\text{M}$  with an estimated HOCl concentration of 760  $\mu\text{M}$  [71]. Previous studies have demonstrated that the airways of cystic fibrosis patients contain increased amount of total iron and the iron-binding protein ferritin [44,76]. This may explain why increased polymorpho neutrophil (PMN) phagocytosis cannot prevent *Pseudomonas aeruginosa* infection [44]. Increase in PMN influx will lead to an increase in HOCl and increase free iron which will accelerate *P. aeruginosa* growth. In related study, Agbai has shown that high  $\text{SCN}^-$  diets give rise to low incidence of sickle cell anemia in Africans, while  $\text{SCN}^-$  deficient American meals cause increase number of cases of the disease in African-American population [77].

We have obtained significant data demonstrating that HOCl can mediate hemoproteins heme destruction and subsequent liberate of free iron in complex biological systems such as intact red blood cells, despite their extensive content of antioxidant such as GSH/glutathione reductase, and catalase [36]. These antioxidant systems have been previously shown to be potent targets of HOCl consumption. We are currently examining the role of HOCl in destroying the RBC of sickle cell patients, a condition known to be associated with higher plasma complement activation and higher MPO levels, (Maitra & Abu-Soud, unpublished data). Since the chemistry between heme and HOCl that we have reported in this study is similar to that which occurs when hemoglobin react with HOCl, this phenomenon may occur in complex biological systems.

In summary, HOCl levels and LPO activity are apparently coupled through complex interdependent pathways. The biological consequences of HOCl-peroxidase interactions may have broad implication for the regulation of local inflammatory, infectious, and cardiovascular events *in vivo*. Increased HOCl levels, the deficiency of potent HOCl scavengers such as taurine, glutathione, and lycopene [78–80], or the deficiency of the natural enzyme substrate,  $\text{SCN}^-$ , may contribute to infection and inflammation by increasing catalytically active free iron levels and enhancing bacterial development.

## Materials and Methods

### Materials

All materials used were of highest purity grade and used without further purification. Sodium hypochlorite ( $\text{NaOCl}$ ), ammonium acetate ( $\text{CH}_3\text{COONH}_3$ ), ferrozine, L-methionine, ascorbic acid, methanol and trifluoroacetic acid (TFA) - HPLC grade, were obtained from Sigma Aldrich (St. Louis, MO, USA). HPLC grade acetonitrile ( $\text{CH}_3\text{CN}$ ) was obtained from EMD Chemicals Inc. (Gibbstown, NJ, USA). Bovine LPO was obtained from Worthington Bio-Chemistry Corp. (Lakewood, NJ, USA) and used with further purification by sepharose column. Purity was confirmed by demonstrating a RZ (Reinheitzzahl) of  $>0.78$  ( $A_{415}/A_{280}$ ), as well as SDS-PAGE analysis. LPO concentration was determined spectrophotometrically by utilizing an extinction coefficient of  $112,000 \text{ M}^{-1} \text{ cm}^{-1}$  at 412 nm [81].

### Absorbance Measurements

Absorbance spectra were recorded using a Cary 100 Bio UV-visible spectrophotometer, at 25°C, pH 7.0. Experiments were performed in a 1 mL phosphate buffer solution supplemented with fixed amount of LPO (1.5  $\mu\text{M}$ ) and increasing concentrations of HOCl (0, 25, 50, 100, 150, 175, 200, and 300  $\mu\text{M}$ ). To accomplish

that, LPO and HOCl were mixed in the cuvette, and then absorbance changes were recorded from 300 to 700 nm.

### Rapid Kinetic Measurements

Kinetic measurements of HOCl-mediated LPO heme destruction were performed using a dual syringe stopped-flow instrument obtained from Hi-Tech, Ltd. (Model SF-61). Measurements were carried out under an aerobic atmosphere at 10°C following rapid mixing of equal volumes of a buffer solution containing a fixed amount of LPO (3 μM final) and a buffer solution containing increasing concentration of HOCl. The time course of the absorbance change was fitted to a single-exponential, ( $Y = 1 - e^{-kt}$ ), or a double-exponential ( $Y = Ae^{-k_1t} + Be^{-k_2t}$ ) function as indicated. Signal-to-noise ratios for all kinetic analyses were improved by averaging at least six to eight individual traces. In some experiments, the stopped-flow instrument was attached to a rapid scanning diode array device (Hi-Tech) designed to collect multiple numbers of complete spectra (200–800 nm) at specific time ranges. The detector was automatically calibrated relative to a holmium oxide filter, as it has spectral peaks at 360.8, 418.5, 446.0, 453.4, 460.4, 536.4, and 637.5 nm, which were used by the software to correctly align pixel positions with wavelength.

### High Performance Liquid Chromatography (HPLC) analysis

HPLC analyses were carried out using a Shimadzu HPLC system equipped with a SCL-10A system controller, with a binary pump solvent delivery (LC-10 AD) module and a SIL-10AD auto-injector connected to a SPD-M10A diode array detector (DAD) and a RF-10A XL fluorescence detector. Alltech 5 μm particle size, 4.6×150 mm reverse-phase octadecylsilica (C18) HPLC column was used. The photodiode array detector was set at 400 nm and the fluorescent detector was set at excitation 321 nm and emission 465 nm to monitor the chromatogram. The column was eluted at a flow rate of 1.0 mL/min with linear gradients of solvents A and B (A, 0.1% TFA in water; B, 0.1% TFA in 80% acetonitrile). The solvent gradient was as follows: 0 to 10 min, 55–65%B; 10 to 14 min, 65–90% B; then the buffer B composition dropped down to 55% within 14 to 24 min. After treatment of LPO (1.5 μM) with HOCl (0 to 400 μM) for 2 hours, the reaction was stopped with 5 molar excess of methionine, and 500 μL of the reaction mixture was diluted with 500 μL of injection solvent (55% B and 45% A) and 50 μL were injected. After the end of the run, the system was equilibrated with 45% solvent A. Each sample was analyzed in triplicate. After treatment with HOCl, the reaction mixture was filtered through an Amicon Ultra-15 centrifugal filter unit with Ultracel-10 membrane (from Millipore) with a 3-kDa cut-off by centrifuging at 14,000 g for 30 min at 4°C.

### Free iron analysis

Free iron release was measured colorimetrically by using the ferrozine-based assay, following a slight modification of a published method [82]. To 100 μL of the sample (LPO-HOCl reaction mixture), 100 μL of ascorbic acid (100 mM) were added. After 5 minutes of incubation at room temperature, 50 μL of

ammonium acetate (16%) and the same volume of ferrozine (16 mM) were added to the mixture and mixed well. Again, after 5 minutes of incubation at room temperature, the absorbance was measured at 562 nm. A standard curve prepared by using ammonium Fe(III) sulfate was used for the calculation of free iron concentration. Final concentrations of the additives are as follows, ascorbic acid-33.33 μM, ammonium acetate 5.3%, and ferrozine 5.3 μM.

### SDS-PAGE

Samples of LPO (1.5 μM) were mixed with increasing HOCl concentrations (0 to 300 μM) and incubated for two hours at room temperature. After reaction completion, methionine (5-fold of the final HOCl concentration) were added to eliminate excess HOCl, and 10 μg of LPO (from the reaction mixtures) were incubated with Laemmli buffer [83] containing 63 mM Tris-HCl (pH 6.8), 2% (w/v) SDS, 10% (v/v) glycerol, 0.0025% (w/v) bromophenol blue, and 10% (v/v) 2-mercaptoethanol. The samples were boiled for 5 minutes at 100°C before loading, and gel electrophoresis was performed for 2 h at a constant voltage of 60 V on 4–12% gradient gels. Three sets of gels were run at room temperature on different days. The gels were then stained with Coomassie blue for 24 hours, destained in methanol/acetic acid to remove background and digitalized. The band intensity of the 77 KDa, corresponding to LPO was quantified using ImageJ (NIH) software and the intensity of the control (untreated LPO) was compared to that of HOCl treated samples. Further the ratio of the band intensities between LPO 77 KDa and the higher molecular weight aggregates were also plotted as a function of HOCl concentration. Relative amounts of protein were estimated by densitometric analysis of the images using Image J software from the NIH [32].

### Solution preparation

HOCl preparation - HOCl was prepared following a slight modification of a published method [84]. Briefly, a stock solution of HOCl was prepared by adding 1 ml NaOCl solution to 40 ml of 154 mM NaCl, and the pH was adjusted to around 3 by adding HCl. The concentration of active total chlorine species in solution expressed as  $[\text{HOCl}]_T$  (where  $[\text{HOCl}]_T = [\text{HOCl}] + [\text{Cl}_2] + [\text{Cl}_3^-] + [\text{OCl}^-]$ ) in 154 mM NaCl was determined by converting all the active chlorine species to  $\text{OCl}^-$  by adding a bolus of 40 μL of 5 M NaOH and measuring the concentration of  $\text{OCl}^-$ . The concentration of  $\text{OCl}^-$  was determined spectrophotometrically at 292 nm ( $\epsilon = 362 \text{ M}^{-1} \text{ cm}^{-1}$ ) [85]. As HOCl is unstable, the stock solution was freshly prepared on a daily basis, stored on ice, and used within one hour of preparation. For further experiments, dilutions were made from the stock solution using 200 mM phosphate buffer pH 7, to give working solutions of lower HOCl concentration.

### Author Contributions

Conceived and designed the experiments: CAS DM GMS MPD AAM SP HMAS. Performed the experiments: CAS DM. Analyzed the data: CAS DM GMS MPD AAM SP HMAS. Contributed reagents/materials/analysis tools: GMS MPD AAM SP HMAS. Wrote the paper: CAS DM MPD HMAS.

### References

- Klebanoff SJ (2005) Myeloperoxidase: friend and foe. *J Leukoc Biol* 77: 598–625.
- Davies MJ, Hawkins CL, Pattison DI, Rees MD (2008) Mammalian heme peroxidases: from molecular mechanisms to health implications. *Antioxid Redox Signal* 10: 1199–1234.
- Podrez EA, Abu-Soud HM, Hazen SL (2000) Myeloperoxidase-generated oxidants and atherosclerosis. *Free Radic Biol Med* 28: 1717–1725.
- Singh AK, Singh N, Tiwari A, Sinha M, Kushwaha GS, et al. First structural evidence for the mode of diffusion of aromatic ligands and ligand-induced closure of the hydrophobic channel in heme peroxidases. *J Biol Inorg Chem* 15: 1099–1107.
- Fiedler TJ, Davey CA, Fenna RE (2000) X-ray crystal structure and characterization of halide-binding sites of human myeloperoxidase at 1.8 Å resolution. *J Biol Chem* 275: 11964–11971.

6. Furtmuller PG, Jantschko W, Zederbauer M, Jakopitsch C, Arnhold J, et al. (2004) Kinetics of interconversion of redox intermediates of lactoperoxidase, eosinophil peroxidase and myeloperoxidase. *Jpn J Infect Dis* 57: S30–31.
7. Dull TJ, Uyeda C, Strosberg AD, Nedwin G, Seilhamer JJ (1990) Molecular cloning of cDNAs encoding bovine and human lactoperoxidase. *DNA Cell Biol* 9: 499–509.
8. Nauseef WM, Malech HL (1986) Analysis of the peptide subunits of human neutrophil myeloperoxidase. *Blood* 67: 1504–1507.
9. Everse J, Everse KE, Grisham MB (1991) Peroxidases in chemistry and biology. Boca Raton Fla.: CRC Press.
10. Marquez LA, Dunford HB, Van Wart H (1990) Kinetic studies on the reaction of compound II of myeloperoxidase with ascorbic acid. Role of ascorbic acid in myeloperoxidase function. *J Biol Chem* 265: 5666–5670.
11. Abu-Soud HM, Hazen SL (2000) Nitric oxide is a physiological substrate for mammalian peroxidases. *J Biol Chem* 275: 37524–37532.
12. Abu-Soud HM, Khassawneh MY, Sohn JT, Murray P, Haxhiu MA, et al. (2001) Peroxidases inhibit nitric oxide (NO) dependent bronchodilation: development of a model describing NO-peroxidase interactions. *Biochemistry* 40: 11866–11875.
13. Galijasevic S, Saed GM, Hazen SL, Abu-Soud HM (2006) Myeloperoxidase metabolizes thiocyanate in a reaction driven by nitric oxide. *Biochemistry* 45: 1255–1262.
14. Heinecke JW, Li W, Daehnke HL, 3rd, Goldstein JA (1993) Dityrosine, a specific marker of oxidation, is synthesized by the myeloperoxidase-hydrogen peroxide system of human neutrophils and macrophages. *J Biol Chem* 268: 4069–4077.
15. Weiss SJ (1989) Tissue destruction by neutrophils. *N Engl J Med* 320: 365–376.
16. Galijasevic S, Saed GM, Diamond MP, Abu-Soud HM (2004) High dissociation rate constant of ferrous-dioxy complex linked to the catalase-like activity in lactoperoxidase. *J Biol Chem* 279: 39465–39470.
17. Abu-Soud HM, Raushel FM, Hazen SL (2004) A novel multistep mechanism for oxygen binding to ferrous hemoproteins: rapid kinetic analysis of ferrous-dioxy myeloperoxidase (compound III) formation. *Biochemistry* 43: 11589–11595.
18. Kettle AJ, Anderson RF, Hampton MB, Winterbourn CC (2007) Reactions of superoxide with myeloperoxidase. *Biochemistry* 46: 4888–4897.
19. Pullar JM, Vissers MC, Winterbourn CC (2000) Living with a killer: the effects of hypochlorous acid on mammalian cells. *IUBMB Life* 50: 259–266.
20. Malech HL, Gallin JI (1987) Current concepts: immunology. Neutrophils in human diseases. *N Engl J Med* 317: 687–694.
21. Malle E, Buch T, Grone HJ (2003) Myeloperoxidase in kidney disease. *Kidney Int* 64: 1956–1967.
22. Ohshima H, Tatemichi M, Sawa T (2003) Chemical basis of inflammation-induced carcinogenesis. *Arch Biochem Biophys* 417: 3–11.
23. Weiss SJ, Klein R, Sliwka A, Wei M (1982) Chlorination of taurine by human neutrophils. Evidence for hypochlorous acid generation. *J Clin Invest* 70: 598–607.
24. Aruoma OI, Halliwell B (1987) Action of hypochlorous acid on the antioxidant protective enzymes superoxide dismutase, catalase and glutathione peroxidase. *Biochem J* 248: 973–976.
25. Malle E, Waeg G, Schreiber R, Grone EF, Sattler W, et al. (2000) Immunohistochemical evidence for the myeloperoxidase/H<sub>2</sub>O<sub>2</sub>/halide system in human atherosclerotic lesions: colocalization of myeloperoxidase and hypochlorite-modified proteins. *Eur J Biochem* 267: 4495–4503.
26. Brennan ML, Hazen SL (2003) Emerging role of myeloperoxidase and oxidant stress markers in cardiovascular risk assessment. *Curr Opin Lipidol* 14: 353–359.
27. Daugherty A, Dunn JL, Rateri DL, Heinecke JW (1994) Myeloperoxidase, a catalyst for lipoprotein oxidation, is expressed in human atherosclerotic lesions. *J Clin Invest* 94: 437–444.
28. Heinecke JW. The protein cargo of HDL: implications for vascular wall biology and therapeutics. *J Clin Lipidol* 4: 371–375.
29. Chau LY (2000) Iron and atherosclerosis. *Proceedings of the National Science Council, Republic of China Part B, Life sciences* 24: 151–155.
30. Stanley N, Stadler N, Woods AA, Bannon PG, Davies MJ (2006) Concentrations of iron correlate with the extent of protein, but not lipid, oxidation in advanced human atherosclerotic lesions. *Free Radic Biol Med* 40: 1636–1643.
31. Trinder D, Fox C, Vautier G, Olynyk JK (2002) Molecular pathogenesis of iron overload. *Gut* 51: 290–295.
32. Galijasevic S, Maitra D, Lu T, Sliskovic I, Abdulhamid I, et al. (2009) Myeloperoxidase interaction with peroxynitrite: chloride deficiency and heme depletion. *Free Radic Biol Med* 47: 431–439.
33. Shishehbor MH, Hazen SL (2004) Inflammatory and oxidative markers in atherosclerosis: relationship to outcome. *Curr Atheroscler Rep* 6: 243–250.
34. Conner GE, Wijkstrom-Frei C, Randell SH, Fernandez VE, Salathe M (2007) The lactoperoxidase system links anion transport to host defense in cystic fibrosis. *FEBS Lett* 581: 271–278.
35. Furtmuller PG, Arnhold J, Jantschko W, Zederbauer M, Jakopitsch C, et al. (2005) Standard reduction potentials of all couples of the peroxidase cycle of lactoperoxidase. *J Inorg Biochem* 99: 1220–1229.
36. Maitra D, Byun J, Andreana PR, Abdulhamid I, Diamond MP, et al. Reaction of hemoglobin with HOCl: mechanism of heme destruction and free iron release. *Free Radic Biol Med* 51: 374–386.
37. Maitra D, Byun J, Andreana PR, Abdulhamid I, Saed GM, et al. Mechanism of hypochlorous acid-mediated heme destruction and free iron release. *Free Radic Biol Med* 51: 364–373.
38. Gerson C, Sabater J, Scuri M, Torbati A, Coffey R, et al. (2000) The lactoperoxidase system functions in bacterial clearance of airways. *Am J Respir Cell Mol Biol* 22: 665–671.
39. Ihalin R, Loimaranta V, Tenovuo J (2006) Origin, structure, and biological activities of peroxidases in human saliva. *Arch Biochem Biophys* 445: 261–268.
40. Tenovuo J, Lumikari M, Soukka T (1991) Salivary lysozyme, lactoferrin and peroxidases: antibacterial effects on cariogenic bacteria and clinical applications in preventive dentistry. *Proc Finn Dent Soc* 87: 197–208.
41. Lee JY, Kim YY, Chang JY, Park MS, Kho HS. The effects of peroxidase on the enzymatic and candidacidal activities of lysozyme. *Arch Oral Biol* 55: 607–612.
42. El-Chemaly S, Salathe M, Baier S, Conner GE, Forteza R (2003) Hydrogen peroxide-scavenging properties of normal human airway secretions. *Am J Respir Crit Care Med* 167: 425–430.
43. Subramani S (1992) Targeting of proteins into the peroxisomal matrix. *J Membr Biol* 125: 99–106.
44. Reid DW, Lam QT, Schneider H, Walters EH (2004) Airway iron and iron-regulatory cytokines in cystic fibrosis. *Eur Respir J* 24: 286–291.
45. Ekmecki OB, Donma O, Sardogan E, Yildirim N, Uysal O, et al. (2004) Iron, nitric oxide, and myeloperoxidase in asthmatic patients. *Biochemistry (Mosc)* 69: 462–467.
46. Gray RD, Duncan A, Noble D, Imrie M, O'Reilly DS, et al. Sputum trace metals are biomarkers of inflammatory and suppurative lung disease. *Chest* 137: 635–641.
47. Furtmuller PG, Jantschko W, Regelsberger G, Jakopitsch C, Arnhold J, et al. (2002) Reaction of lactoperoxidase compound I with halides and thiocyanate. *Biochemistry* 41: 11895–11900.
48. Kettle AJ, Winterbourn CC (1994) Assays for the chlorination activity of myeloperoxidase. *Methods Enzymol* 233: 502–512.
49. Clark RA (2008) Oxidative stress and “senescent” fibroblasts in non-healing wounds as potential therapeutic targets. *J Invest Dermatol* 128: 2361–2364.
50. Crichton RR, Wilmet S, Legssyer R, Ward RJ (2002) Molecular and cellular mechanisms of iron homeostasis and toxicity in mammalian cells. *J Inorg Biochem* 91: 9–18.
51. Kumar S, Bandyopadhyay U (2005) Free heme toxicity and its detoxification systems in human. *Toxicol Lett* 157: 175–188.
52. Ong WY, Halliwell B (2004) Iron, atherosclerosis, and neurodegeneration: a key role for cholesterol in promoting iron-dependent oxidative damage? *Ann N Y Acad Sci* 1012: 51–64.
53. Yamaguchi K, Mandai M, Toyokuni S, Hamanishi J, Higuchi T, et al. (2008) Contents of endometriotic cysts, especially the high concentration of free iron, are a possible cause of carcinogenesis in the cysts through the iron-induced persistent oxidative stress. *Clin Cancer Res* 14: 32–40.
54. Defrere S, Lousse JC, Gonzalez-Ramos R, Colette S, Donnez J, et al. (2008) Potential involvement of iron in the pathogenesis of peritoneal endometriosis. *Mol Hum Reprod* 14: 377–385.
55. Nagababu E, Rifkind JM (2004) Heme degradation by reactive oxygen species. *Antioxid Redox Signal* 6: 967–978.
56. Hu S, Kincaid JR (1991) Resonance Raman structural characterization and the mechanism of formation of lactoperoxidase compound III. *Journal of the American Chemical Society* 113: 7189–7194.
57. Chapman AL, Winterbourn CC, Brennan SO, Jordan TW, Kettle AJ (2003) Characterization of non-covalent oligomers of proteins treated with hypochlorous acid. *Biochem J* 375: 33–40.
58. Stadman ER, Berlett BS (1997) Reactive oxygen-mediated protein oxidation in aging and disease. *Chem Res Toxicol* 10: 485–494.
59. Horvich A (2002) Protein aggregation in disease: a role for folding intermediates forming specific multimeric interactions. *J Clin Invest* 110: 1221–1232.
60. DiFiglia M, Sapp E, Chase KO, Davies SW, Bates GP, et al. (1997) Aggregation of huntingtin in neuronal intranuclear inclusions and dystrophic neurites in brain. *Science* 277: 1990–1993.
61. Koo EH, Lansbury PT, Jr., Kelly JW (1999) Amyloid diseases: abnormal protein aggregation in neurodegeneration. *Proc Natl Acad Sci U S A* 96: 9989–9990.
62. Tahboub YR, Galijasevic S, Diamond MP, Abu-Soud HM (2005) Thiocyanate modulates the catalytic activity of mammalian peroxidases. *J Biol Chem* 280: 26129–26136.
63. Adak S, Mazumdar A, Banerjee RK (1997) Low catalytic turnover of horseradish peroxidase in thiocyanate oxidation. Evidence for concurrent inactivation by cyanide generated through one-electron oxidation of thiocyanate. *J Biol Chem* 272: 11049–11056.
64. Aunc TM, Thomas EL (1977) Accumulation of hypothiocyanite ion during peroxidase-catalyzed oxidation of thiocyanate ion. *Eur J Biochem* 80: 209–214.
65. Newman AA (1975) Chemistry and biochemistry of thiocyanic acid and its derivatives. London ; New York: Academic Press. xiv, 351 p.
66. Chung J, Wood JL (1970) Oxidation of thiocyanate to cyanide and sulfate by the lactoperoxidase-hydrogen peroxide system. *Arch Biochem Biophys* 141: 73–78.
67. Ashby MT, Carlson AC, Scott MJ (2004) Redox Buffering of Hypochlorous Acid by Thiocyanate in Physiologic Fluids. *Journal of the American Chemical Society* 126: 15976–15977.
68. Conner GE, Salathe M, Forteza R (2002) Lactoperoxidase and hydrogen peroxide metabolism in the airway. *Am J Respir Crit Care Med* 166: S57–61.
69. Wijkstrom-Frei C, El-Chemaly S, Ali-Rachedi R, Gerson C, Cobas MA, et al. (2003) Lactoperoxidase and human airway host defense. *Am J Respir Cell Mol Biol* 29: 206–212.

70. Mertz W, Underwood EJ (1986) Trace elements in human and animal nutrition. Orlando: Academic Press.
71. Gould NS, Gauthier S, Kariya CT, Min E, Huang J, et al. Hypertonic saline increases lung epithelial lining fluid glutathione and thiocyanate: two protective CFTR-dependent thiols against oxidative injury. *Respir Res* 11: 119.
72. Moskwa P, Lorentzen D, Excoffon KJ, Zabner J, McCray PB, Jr., et al. (2007) A novel host defense system of airways is defective in cystic fibrosis. *Am J Respir Crit Care Med* 175: 174–183.
73. Thomson E, Brennan S, Senthilmohan R, Gangell CL, Chapman AL, et al. Identifying peroxidases and their oxidants in the early pathology of cystic fibrosis. *Free Radic Biol Med* 49: 1354–1360.
74. Pattison DI, Hawkins CL, Davies MJ (2009) What are the plasma targets of the oxidant hypochlorous acid? A kinetic modeling approach. *Chem Res Toxicol* 22: 807–817.
75. Van Der Vliet A, Nguyen MN, Shigenaga MK, Eiserich JP, Marelich GP, et al. (2000) Myeloperoxidase and protein oxidation in cystic fibrosis. *Am J Physiol Lung Cell Mol Physiol* 279: L537–546.
76. Reid DW, Anderson GJ, Lamont IL (2008) Cystic fibrosis: ironing out the problem of infection? *Am J Physiol Lung Cell Mol Physiol* 295: L23–24.
77. Agbai O (1986) Anti-sickling effect of dietary thiocyanate in prophylactic control of sickle cell anemia. *J Natl Med Assoc* 78: 1053–1056.
78. Pennathur S, Maitra D, Byun J, Sliskovic I, Abdulhamid I, et al. Potent antioxidative activity of lycopene: A potential role in scavenging hypochlorous acid. *Free Radic Biol Med* 49: 205–213.
79. Schaffer SW, Azuma J, Mozaffari M (2009) Role of antioxidant activity of taurine in diabetes. *Can J Physiol Pharmacol* 87: 91–99.
80. Bouckennooghe T, Remacle C, Reusens B (2006) Is taurine a functional nutrient? *Curr Opin Clin Nutr Metab Care* 9: 728–733.
81. Bolscher BG, Plat H, Wever R (1984) Some properties of human eosinophil peroxidase, a comparison with other peroxidases. *Biochim Biophys Acta* 784: 177–186.
82. Carter P (1971) Spectrophotometric determination of serum iron at the submicrogram level with a new reagent (ferrozine). *Anal Biochem* 40: 450–458.
83. Laemmli UK (1970) Cleavage of structural proteins during the assembly of the head of bacteriophage T4. *Nature* 227: 680–685.
84. Wang L, Bassiri M, Najafi R, Najafi K, Yang J, et al. (2007) Hypochlorous acid as a potential wound care agent: part I. Stabilized hypochlorous acid: a component of the inorganic armamentarium of innate immunity. *J Burns Wounds* 6: e5.
85. Furman CS, Margerum DW (1998) Mechanism of Chlorine Dioxide and Chlorate Ion Formation from the Reaction of Hypobromous Acid and Chlorite Ion. *Inorg Chem* 37: 4321–4327.
86. Jantschko W, Furtmuller PG, Zederbauer M, Neugschwandtner K, Jakopitsch C, et al. (2005) Reaction of ferrous lactoperoxidase with hydrogen peroxide and dioxygen: an anaerobic stopped-flow study. *Arch Biochem Biophys* 434: 51–59.
